# Supplementary material for: Air-stable, recyclable, and time-efficient diphenylphosphinite cellulose-supported palladium nanoparticles as a catalyst for Suzuki–Miyaura reactions
Source: publisher site journal article supplement (doi:10.3762/bjoc.7.48), 2011-03-30
Supplement: Additional file 1 [file 1860-5397-7-48-S1.pdf]

# Supporting Information

for

## **Air-stable, recyclable, and time-efficient diphenylphosphinite cellulose-supported palladium nanoparticles as a catalyst for Suzuki–Miyaura reactions**

Qingwei Du and Yiqun Li\*

Address: Department of Chemistry, Jinan University, 510632 Guangzhou,

China

Email: Yiqun Li\* - tlyq@jnu.edu.cn

\*Corresponding author

### **IR for catalyst and selected products**

#### **Content**

|                                                  |    |
|--------------------------------------------------|----|
| IR Cell–OPPh <sub>2</sub> .....                  | S2 |
| IR Cell–OPPh <sub>2</sub> –Pd <sup>0</sup> ..... | S2 |
| IR <b>3b</b> .....                               | S3 |
| IR <b>3e</b> .....                               | S3 |
| IR <b>3k</b> .....                               | S4 |
| IR <b>3n</b> .....                               | S4 |

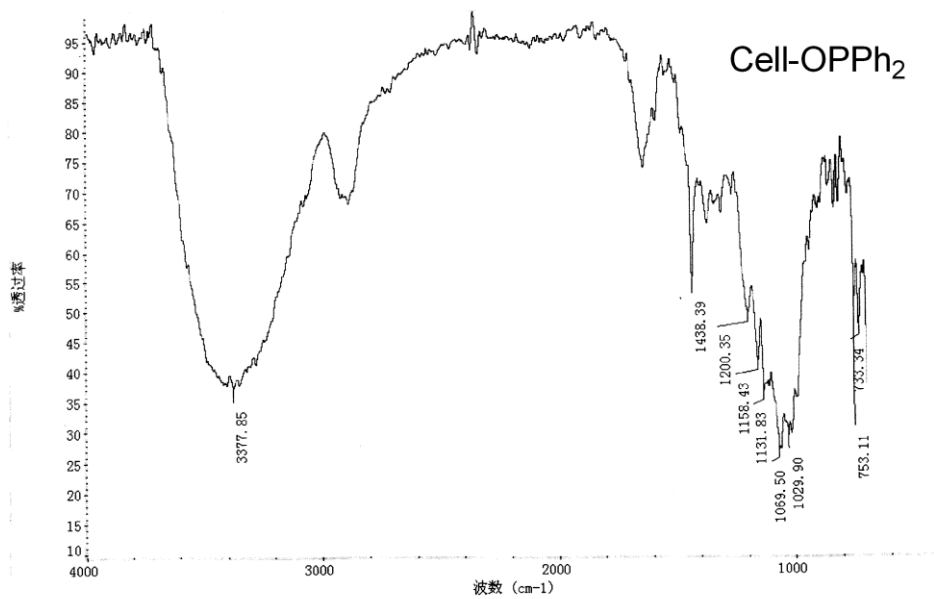

Figure 1: IR of Cell-OPPh<sub>2</sub>.

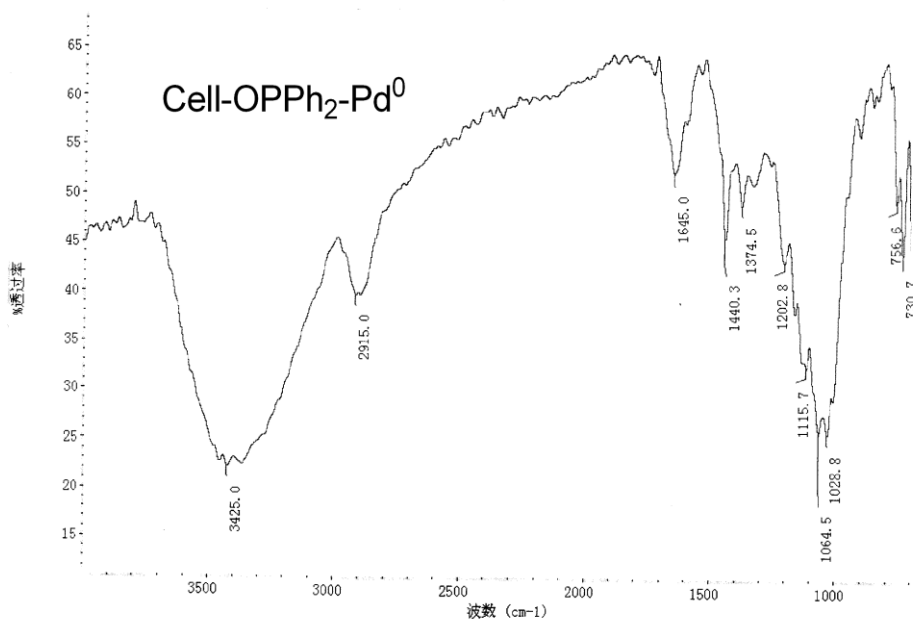

Figure 2: IR of Cell-OPPh<sub>2</sub>-Pd<sup>0</sup>.

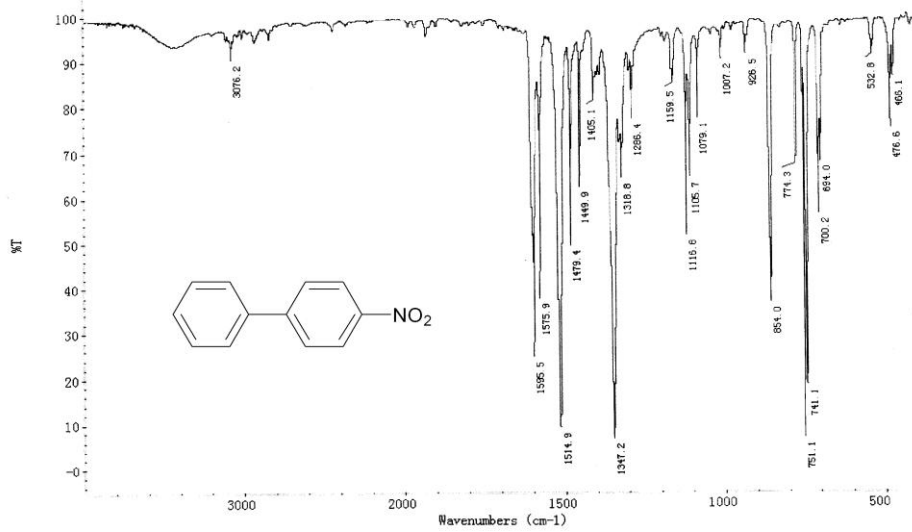

Figure 3: IR of 4-nitro-biphenyl (3b).

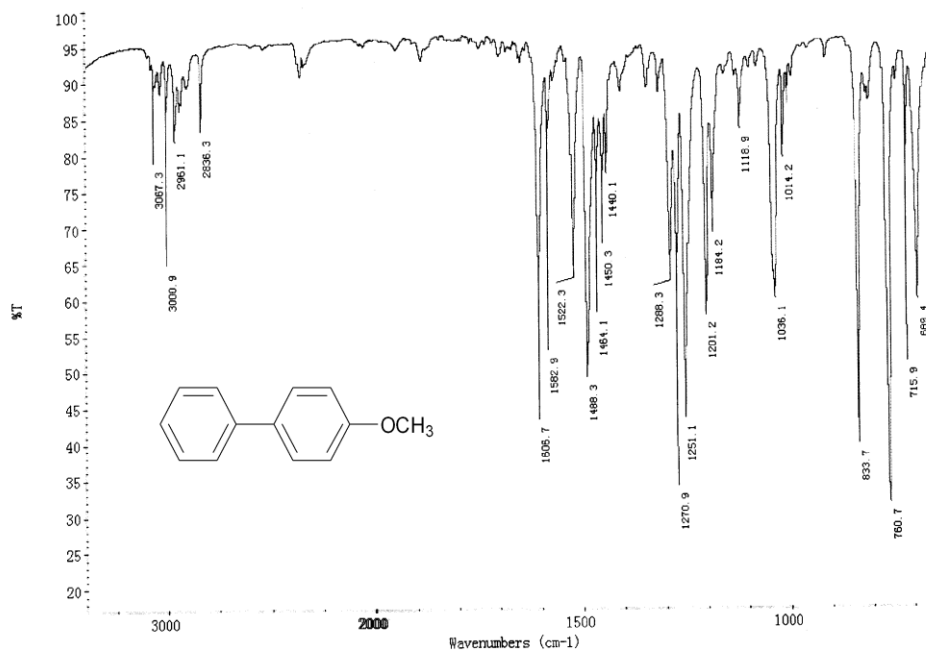

Figure 4: IR of 4-methoxy-biphenyl (3e).

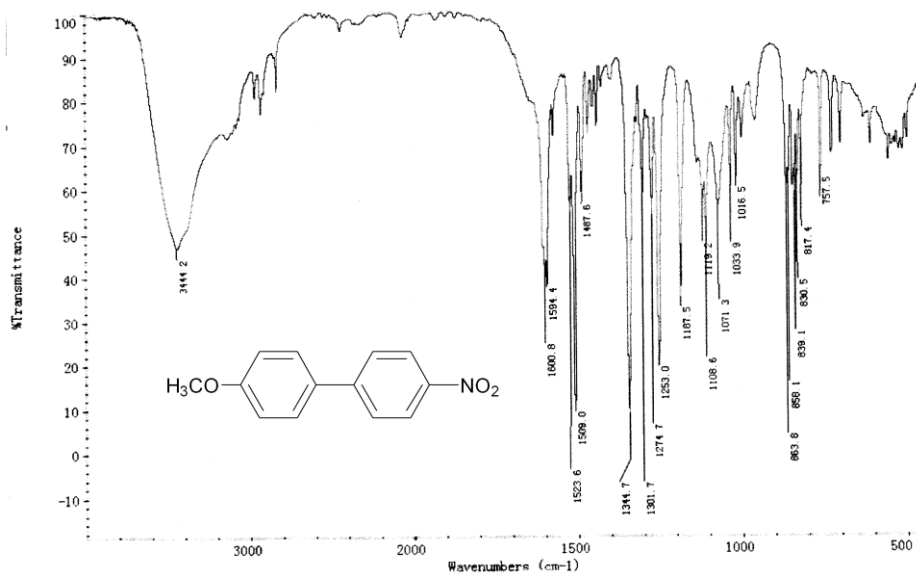

Figure 5: IR of 4'-methoxy-4-nitrobiphenyl (**3k**).

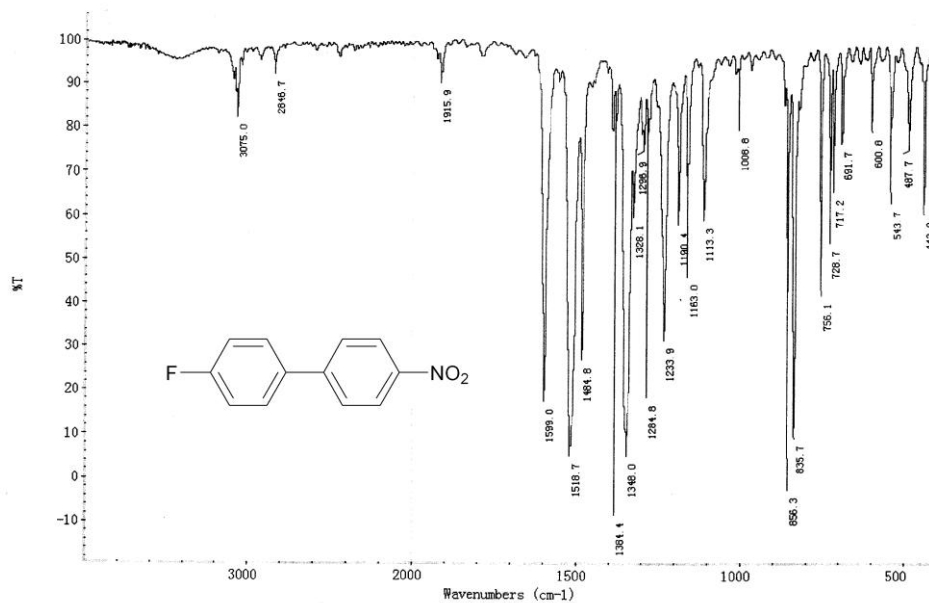

Figure 6: IR of 4-fluoro-4'-nitrobiphenyl (**3n**).
