# Supplementary material for: Air-stable, recyclable, and time-efficient diphenylphosphinite cellulose-supported palladium nanoparticles as a catalyst for Suzuki–Miyaura reactions
Source: publisher site journal article supplement (doi:10.3762/bjoc.7.48), 2011-03-30
Supplement: Additional file 2 [file 1860-5397-7-48-S2.pdf]

# Supporting Information

for

## **Air-stable, recyclable, and time-efficient diphenylphosphinite cellulose-supported palladium nanoparticles as a catalyst for Suzuki–Miyaura reactions**

Qingwei Du and Yiqun Li\*

Address: Department of Chemistry, Jinan University, 510632 Guangzhou,

China

Email: Yiqun Li\* - tlyq@jnu.edu.cn

\*Corresponding author

### **<sup>1</sup>H NMR for selected products**

#### **Content**

|                                    |    |
|------------------------------------|----|
| <sup>1</sup> H NMR <b>3b</b> ..... | S2 |
| <sup>1</sup> H NMR <b>3e</b> ..... | S2 |
| <sup>1</sup> H NMR <b>3k</b> ..... | S3 |
| <sup>1</sup> H NMR <b>3n</b> ..... | S3 |

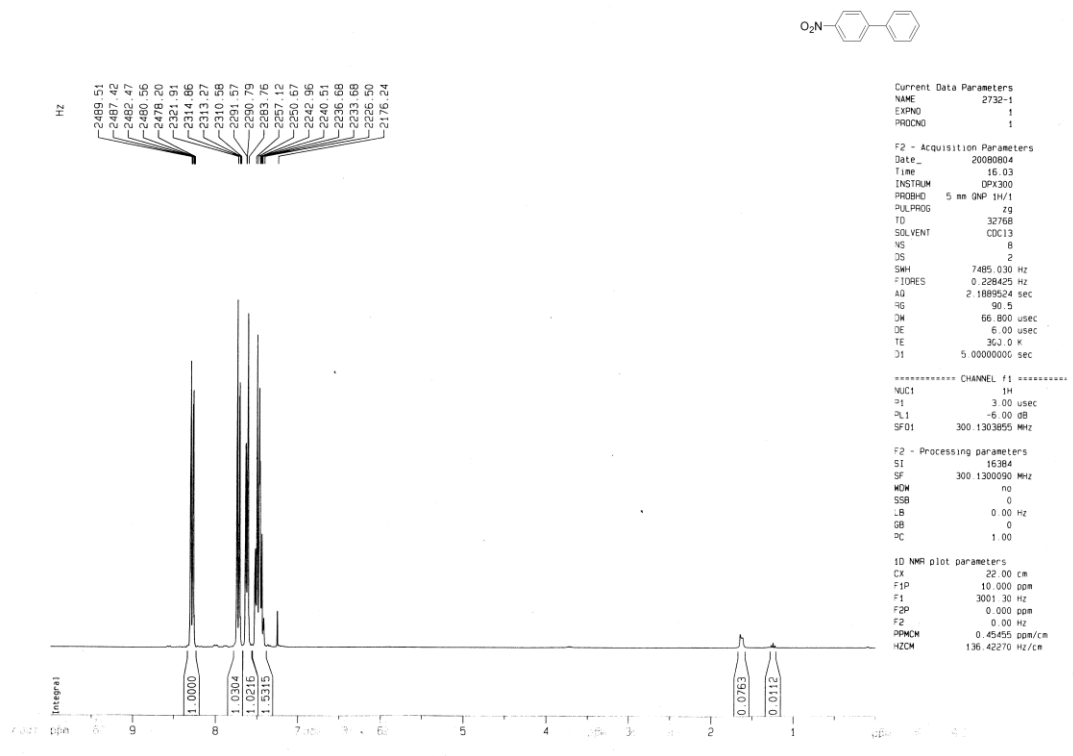

Figure 1:  $^1\text{H}$  NMR of 4-nitrobiphenyl (**3b**).

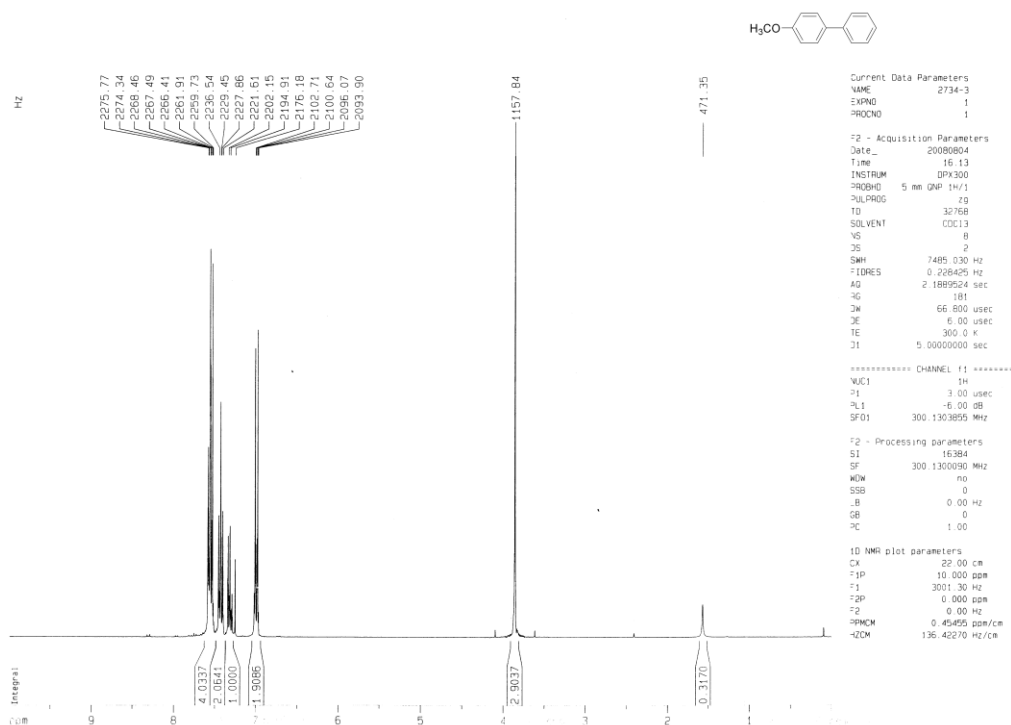

Figure 2:  $^1\text{H}$  NMR of 4-methoxybiphenyl (**3e**).

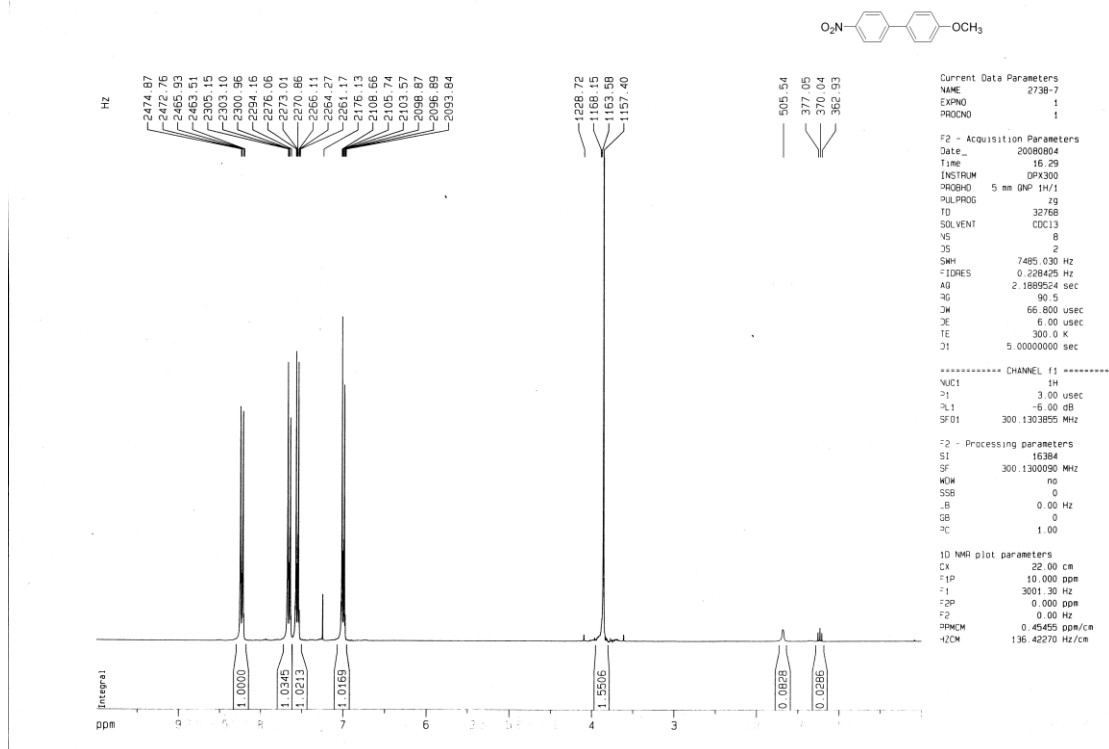

Figure 3: <sup>1</sup>H NMR of 4'-methoxy-4-nitrophenyl (3k).

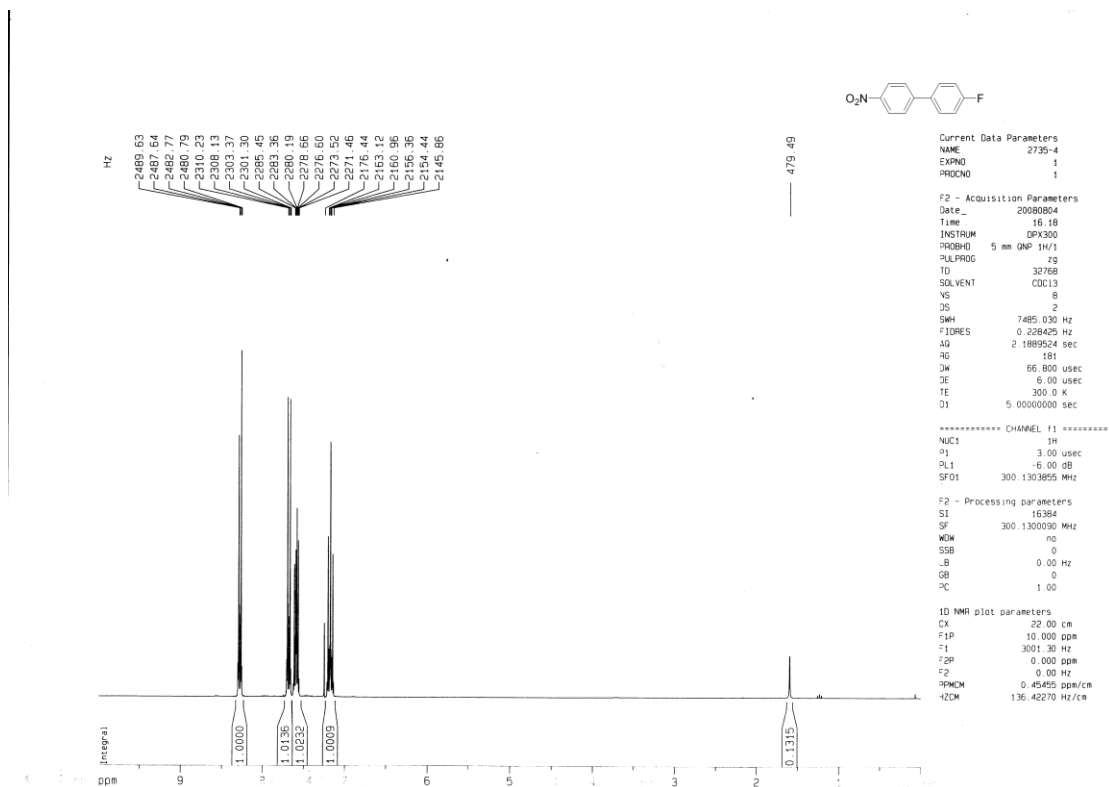

Figure 4: <sup>1</sup>H NMR of 4-fluoro-4'-nitrophenyl (3n).
